# Supplementary material
Source: MDPI journal article supplement (https://www.mdpi.com/2079-6412/13/1/172)
Supplement: s1 [file s1 › coatings-2115430-supplementary.pdf]

# Influence of Surface Coating towards the Controlled Toxicity of ZnO Nanoparticles In Vitro

Faruq Mohammad <sup>1,\*</sup>, Ibrahim Birma Bwatanglang <sup>2</sup>, Hamad A. Al-Lohedan <sup>1\*</sup>, Jilani Shaik<sup>3</sup>, Hissah Hamad Al-Tilasi <sup>1</sup>, Ahmed A. Soleiman<sup>4</sup>

<sup>1</sup>Department of Chemistry, College of Science, King Saud University, Riyadh 11451 Kingdom of Saudi Arabia.

<sup>2</sup>Department of Pure and Applied Chemistry, Faculty of Science, Adamawa State University, Mubi, Nigeria.

<sup>3</sup>Department of Biochemistry, College of Science, King Saud University, Riyadh 11451 Kingdom of Saudi Arabia.

<sup>4</sup>Department of Chemistry, Southern University and A&M College, Baton Rouge, Louisiana 70813 USA.

\* Correspondence: fmohammad@ksu.edu.sa; hlohedan@ksu.edu.sa; Tel: +966-114675998

## Supporting information:

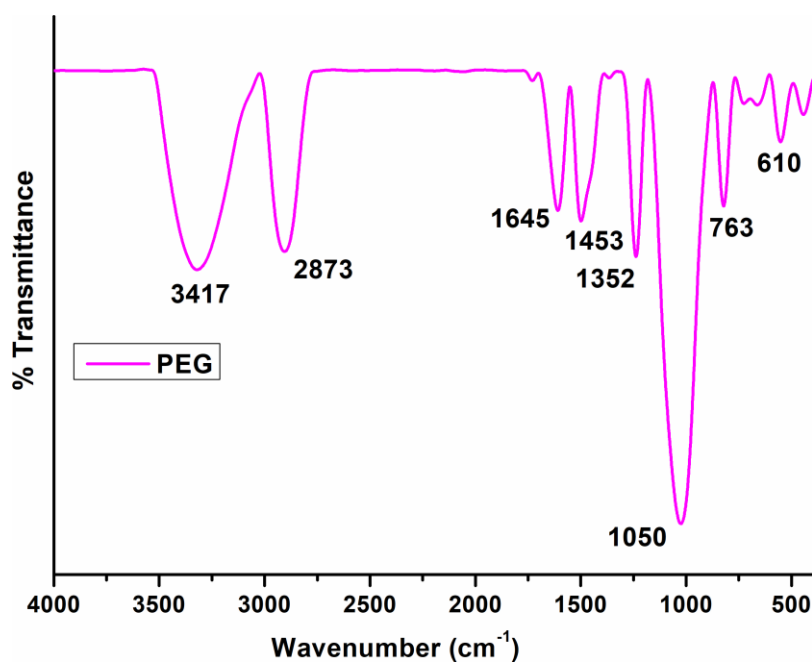

**Figure S1.** FTIR spectral analysis of pure PEG sample.

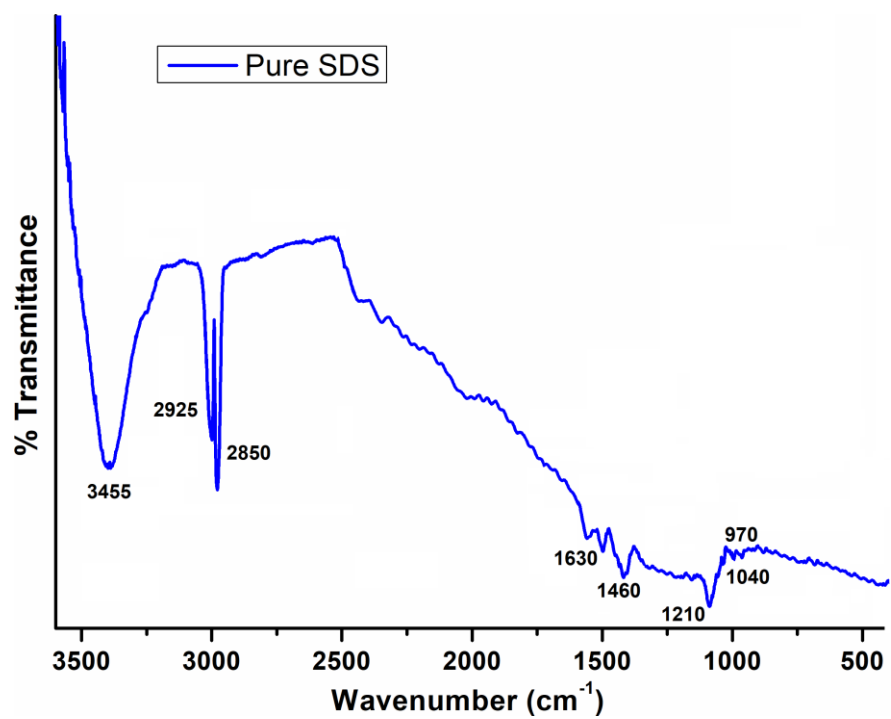

**Figure S2.** FTIR spectral analysis of pure SDS sample.

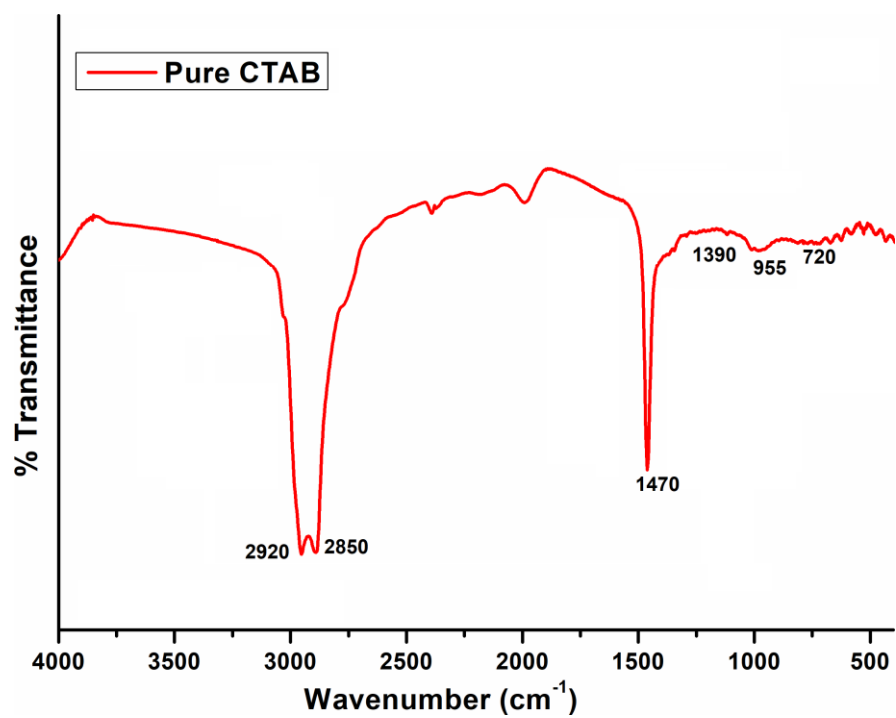

**Figure S3.** FTIR spectral analysis of pure CTAB sample.

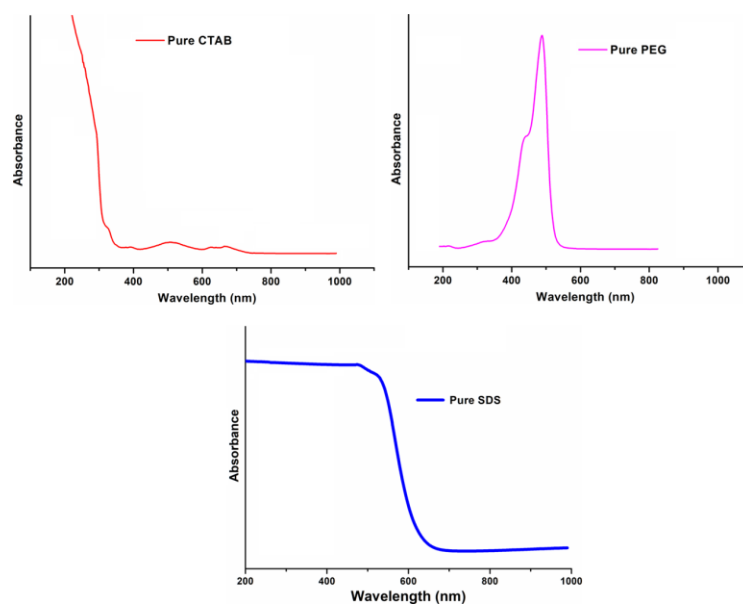

**Figure S4.** UV-Vis spectral analysis of pure samples of CTAB, PEG, and SDS.
